# Supplementary material
Source: PubMed Central journal article supplement (PMC6460286)
Supplement: NIHMS932298-supplement-Supplementary.pdf [file NIHMS932298-supplement-Supplementary.pdf]

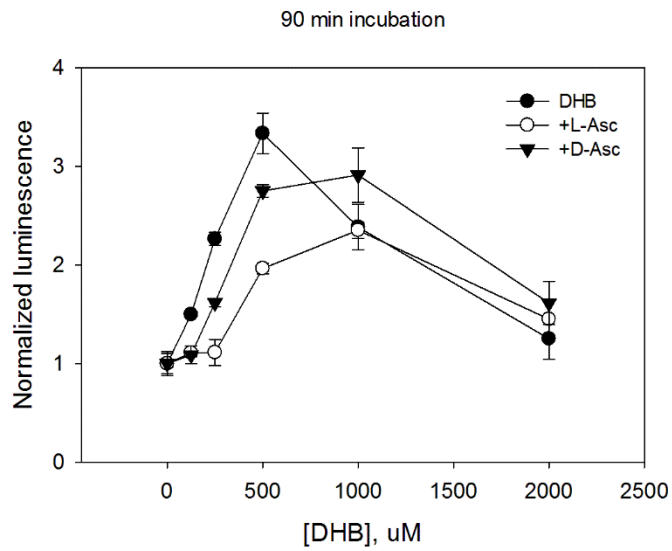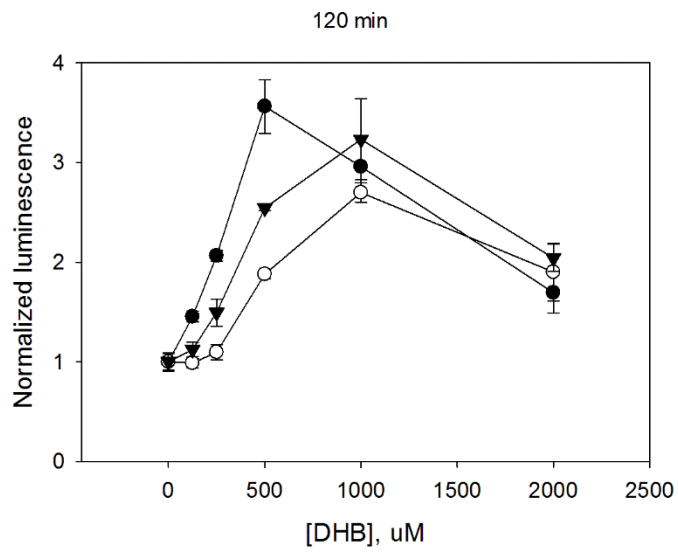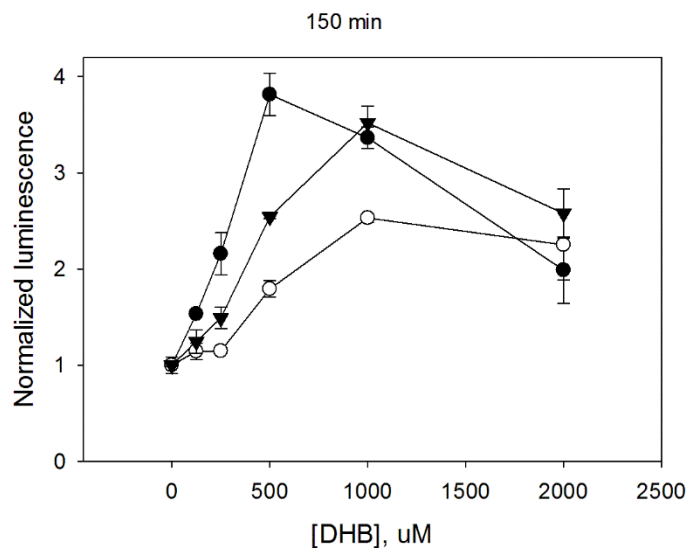

**Supplementary Fig.S1.** Effect of incubation duration (90, 120,150 min) on reporter activation with DHB in the presence of 100  $\mu$ M L- or D-Asc. Details under Materials and methods.

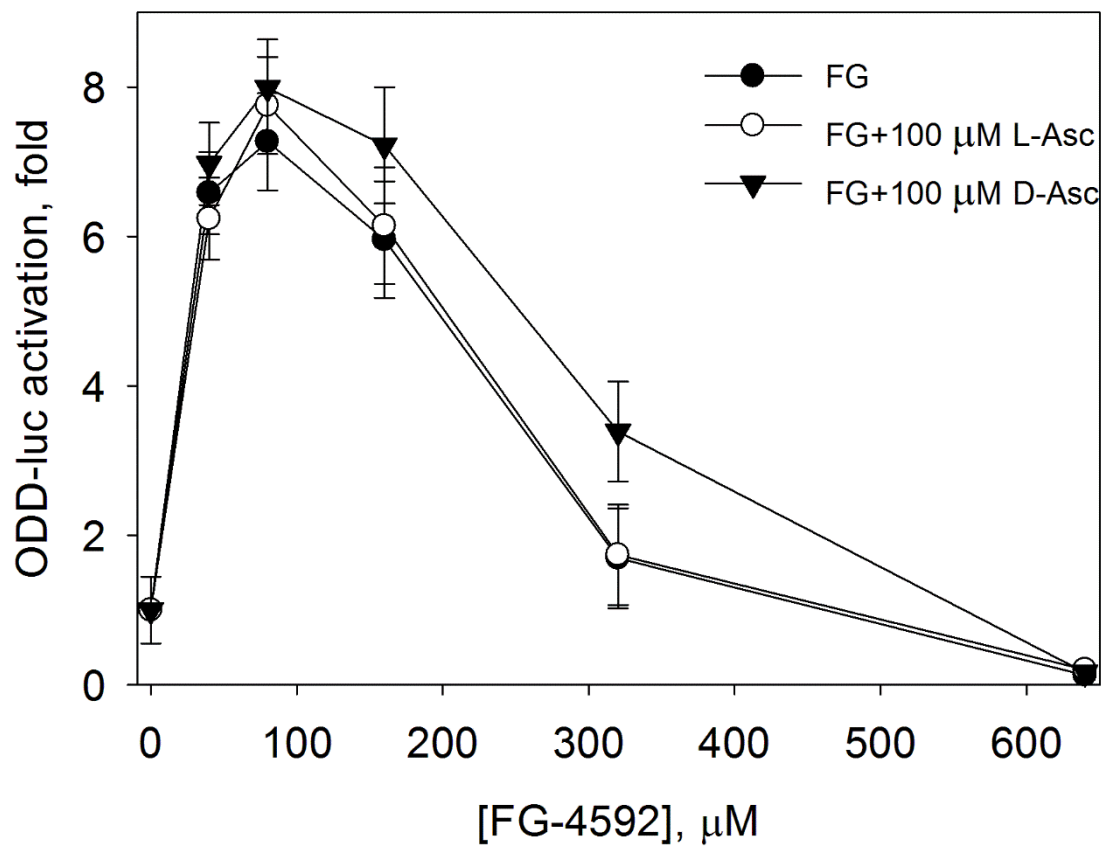

**Supplementary Fig.S2.** Effect of L- or D-Asc co-treatment of reporter activation induced by FG-4592 at 3 h incubation. Details under Materials and methods.
